# Supplementary material for: Time Ring Data: Definition and Application in Spatio-Temporal Analysis of Urban Expansion and Forest Loss
Source: MDPI journal article supplement (doi:10.3390/rs15040972), 2023-02-10
Supplement: s1 [file s1]

## Speed Map

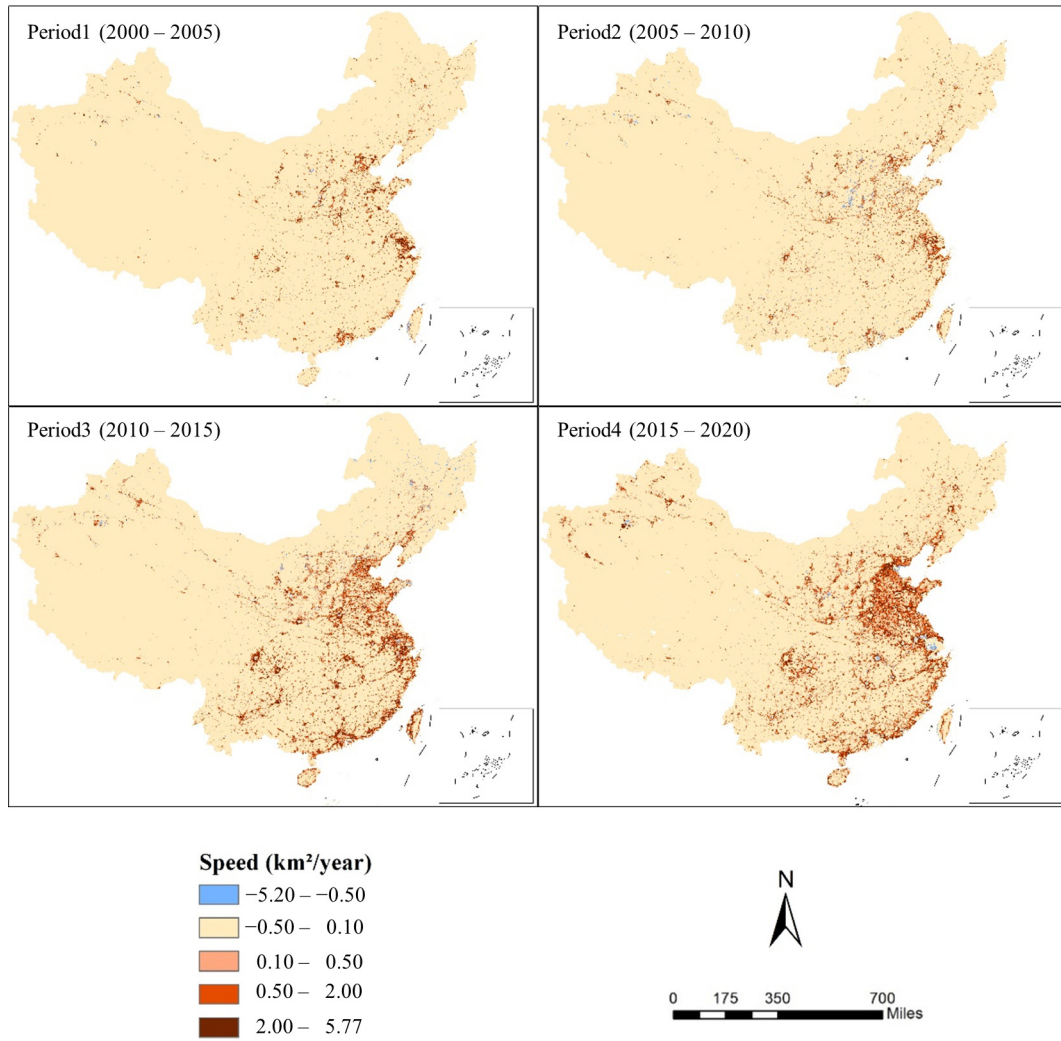

**Figure S1.** The speed maps of NTL in China based on NTL TR data.

## Acceleration Map

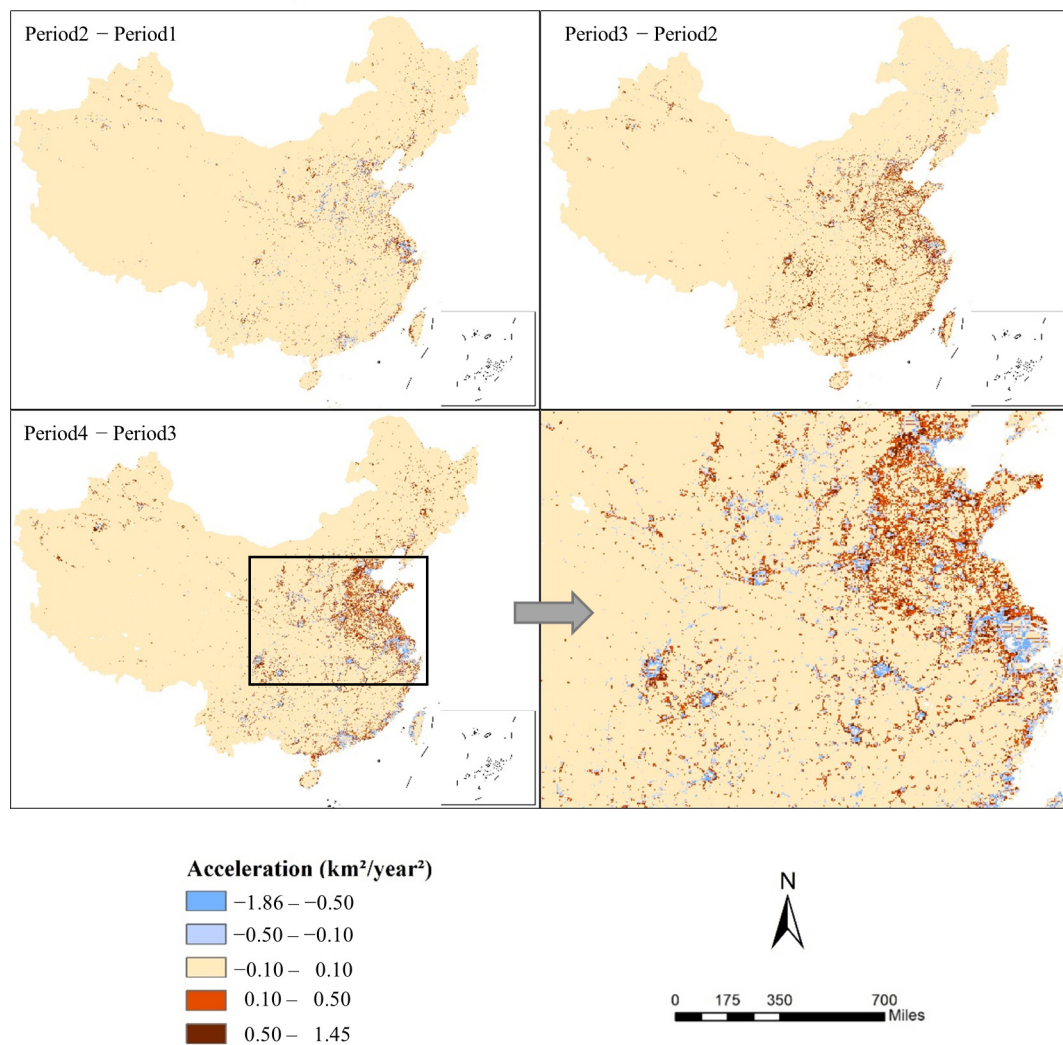

**Figure S2.** The acceleration maps of NTL in China based on NTL TR data.
